# Supplementary material
Source: publisher figshare collection journal article supplement (https://acs.figshare.com/ndownloader/files/3619290)

**Enantioselective Total Synthesis of (–)-Nardoaristolone B via a  
Gold(I)-Catalyzed Oxidative Cyclization**

Anna Homs, Michael E. Muratore and Antonio M. Echavarren\*

*Institute of Chemical Research of Catalonia (ICIQ), Tarragona, Spain*

E-mail: aechavarren@iciq.es

**Supporting Information**

## Table of Contents

1. General Information
2. Screening of Conditions
3. Synthesis of (–)-nardoaristolone B and compounds **8** and **10**
4. NMR Spectra
5. X-Ray Crystallographic Data
6. MS for **3** and **4**

## 1. General Information

Unless otherwise stated, reactions were carried out under argon atmosphere in solvents dried by passing through an activated alumina column on a PureSolv<sup>TM</sup> solvent purification system (Innovative Technologies, Inc., MA). Analytical thin layer chromatography was carried out using TLC-aluminium sheets with 0.2 mm of silica gel (Merck GF<sub>254</sub>) using UV light as the visualizing agent and an acidic solution of vanillin or anisaldehyde in ethanol as the developing agent. Chromatographic purifications were carried out using flash grade silica gel (SDS Chromatogel 60 ACC, 40-63  $\mu$ m). Organic solutions were concentrated under reduced pressure on a Büchi rotary evaporator.

NMR spectra were recorded at 298 K on a Bruker Avance 400 Ultrashield and Bruker Avance 500 Ultrashield apparatuses. Mass spectra were recorded on a Waters Micromass LCT Premier (ESI), Waters Micromass GCT (EI, CI) and Bruker Daltonics Autoflex (MALDI) spectrometers. Melting points were determined using a Büchi melting point apparatus.

Crystal structure determinations were carried out using a Bruker-Nonius diffractometer equipped with an APEX 2 4K CCD area detector, a FR591 rotating anode with MoK <sub>$\alpha$</sub>  radiation, Montel mirrors as monochromator and a Kryoflex low temperature device ( $T = -173$  °C). Full-sphere data collection was used with  $\omega$  and  $\phi$  scans. *Programs used*: Data collection APEX-2, data reduction Bruker SAINT V6.0A and absorption correction SADABS. Structure Solution and Refinement: Crystal structure solutions were achieved using direct methods as implemented in SHELXTL and visualized using the program XP. Missing atoms were subsequently located from difference Fourier synthesis and added to the atom list. Least-squares refinement on  $F^2$  using all measured intensities was carried out using the program SHELXTL. All non-hydrogen atoms were refined including anisotropic displacement parameters.

HPLC analysis was carried out in an Agilent Technologies instrument HPLC 1100 series with VWD detector or HPLC 1200 series with DAD detector. The column used was a Chiralpack IC (4.6 mm x 250 mm) eluting with hexane:isopropanol (99:1), 0.85 mL/min flow, 5  $\mu$ L injection and  $\lambda = 210$  nm.

2-methylcyclohexenone,<sup>1</sup> phosphoramidite L\*,<sup>2</sup> methallyl iodide<sup>3</sup> and 2-*tert*-butylpyridine *N*-oxide (PNO6)<sup>4</sup> were prepared according to the literature whereas the other reagents were purchased from SigmaAldrich or Alfa Aesar. RhCl<sub>3</sub>·xH<sub>2</sub>O was purchased from Strem Chemicals.

---

<sup>1</sup> Baker, L.; Minehan, T. *J. Org. Chem.* **2004**, *69*, 3957–3960.

<sup>2</sup> Smith, C. R.; RajanBabu, T. V. *Org. Lett.* **2008**, *10*, 1657–1659.

<sup>3</sup> Smith, A. B., III.; Mesaros, E. F.; Meyer, E. A. *J. Am. Chem. Soc.* **2006**, *128*, 5292–5299.

<sup>4</sup> Bell, T. W.; Hu, L. H.; Patel, S. V. *J. Org. Chem.* **1987**, *52*, 3847–3850.

## 2. Screening of Conditions

### a) Isomerization of the *exo*-olefin **3** into trisubstituted *endo*-olefin **4**

Preliminary screening of conditions

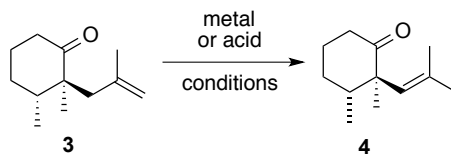

| Entry | Metal or acid                                       | Conditions                                       | Outcome                      |
|-------|-----------------------------------------------------|--------------------------------------------------|------------------------------|
| 1     | RhCl(PPh <sub>3</sub> ) <sub>3</sub>                | EtOH, reflux, 52 h                               | No reaction                  |
| 2     | PdCl <sub>2</sub> (PhCN) <sub>2</sub>               | (CH <sub>2</sub> Cl) <sub>2</sub> , reflux, 20 h | Traces of <b>3</b>           |
| 3     | RhCl <sub>3</sub> ·xH <sub>2</sub> O <sup>[a]</sup> | EtOH, sealed tube<br>115 °C, 1 h                 | 42% of <b>3</b> + 10%<br>usm |
| 4     | CF <sub>3</sub> SO <sub>3</sub> H                   | dioxane, 95 °C, 30 h                             | Decomposition                |

usm = unreacted starting material

Optimization of conditions

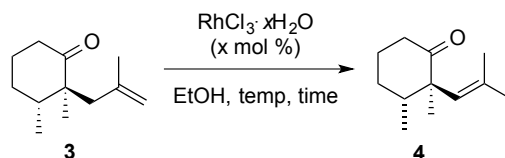

| Entry | RhCl <sub>3</sub> ·xH <sub>2</sub> O<br>(mol %) | Temp. | Time  | [c]     | Yield<br><b>4</b> + <b>3</b> <sup>a</sup> |
|-------|-------------------------------------------------|-------|-------|---------|-------------------------------------------|
| 1     | 30                                              | 23 °C | 24 h  | 0.019 M | < 1% + >95%                               |
| 2     | 30                                              | 40 °C | 24 h  | 0.019 M | 4% + > 90%                                |
| 3     | 30                                              | 60 °C | 24 h  | 0.019 M | 74% + 5%                                  |
| 4     | 30                                              | 60 °C | 4 h   | 0.019 M | 83% + 10%                                 |
| 5     | 30                                              | 75 °C | 4 h   | 0.019 M | 68% + <3%                                 |
| 6     | 20                                              | 75 °C | 5 h   | 0.019 M | 86% + < 3% (71%) <sup>b</sup>             |
| 7     | 20                                              | 90 °C | 2 h   | 0.019 M | 64% + 4%                                  |
| 8     | 10                                              | 75 °C | 10 h  | 0.019 M | 64% + 5%                                  |
| 9     | 10                                              | 90 °C | 2 h   | 0.019 M | 72% + 9%                                  |
| 10    | 10                                              | 90 °C | 2 h   | 0.048 M | 66% + 2%                                  |
| 11    | 5                                               | 75 °C | 2 h   | 0.037 M | 65% + 6%                                  |
| 12    | 5                                               | 75 °C | 4.5 h | 0.078 M | 83% + < 3% (74%) <sup>b</sup>             |

<sup>a</sup> GC-MS yield determined using diphenylmethane as internal standard; <sup>b</sup> Yields isolated after purification by column chromatography.

### b) Kumada Cross-Coupling

Optimization on model enol triflate

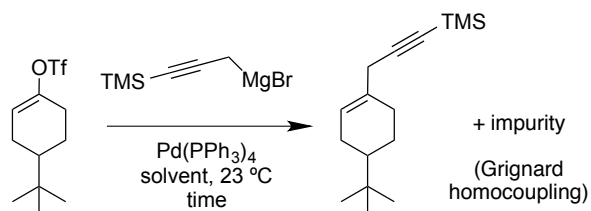

<sup>a</sup> Calibrated GC yields against 1,3,5-tribromobenzene as internal standard; GC ratio of areas product/impurity (uncalibrated).

<sup>a</sup> Ratio of areas product:starter determined by GC-MS (uncalibrated); <sup>b</sup> Yield isolated after column chromatography; <sup>c</sup> Contains *ca.* 50% of inseparable impurity originating from the dimerization of the Grignard reagent; <sup>d</sup> Contains *ca.* 10% of inseparable impurity originating from the dimerization of the Grignard reagent.

| Entry | Oxidant    | Yield 7/9 <sup>a</sup>       |
|-------|------------|------------------------------|
| 1     | PNO1       | 31/5                         |
| 2     | PNO2       | 20/36                        |
| 3     | PNO3       | 74/15<br>(isolated products) |
| 4     | PNO4       | 0/55                         |
| 5     | PNO5       | 20/25                        |
| 6     | PNO6       | 0/44                         |
| 7     | PNO7       | 21/9                         |
| 8     | No oxidant | Decomposition                |

<sup>a</sup> Unless otherwise stated, yield determined by <sup>1</sup>H-NMR using diphenylmethane as internal standard

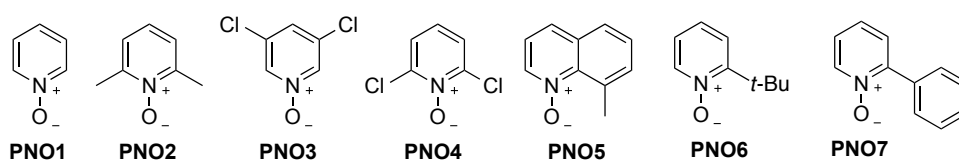

d) Screening of conditions for the Au(I)-catalyzed oxidative cyclization of 1,6-enynes

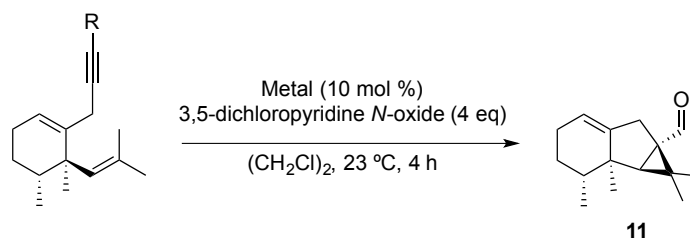

| Entry | Metal                 | R   | Yield <sup>a</sup>                |
|-------|-----------------------|-----|-----------------------------------|
| 1     | IPrAuNTf <sub>2</sub> | H   | 65% isolated                      |
| 2     | AuCl                  | H   | 86%                               |
| 3     | AuBr <sub>3</sub>     | H   | 80%                               |
| 4     | PtCl <sub>2</sub>     | H   | 70% + 25% cycloisomerized product |
| 5     | IPrAuNTf <sub>2</sub> | TMS | 50% (24 h, 50% conversion)        |
| 6     | PtCl <sub>2</sub>     | TMS | No reaction                       |

<sup>a</sup> Unless otherwise stated, yield determined by <sup>1</sup>H-NMR using diphenylmethane as internal standard

### 3. Procedures for the synthesis of (–)nardoaristolone B and compounds 8 and 10

#### (2*S*,3*R*)-2,3-dimethyl-2-(2-methylallyl)cyclohexan-1-one (**3**)

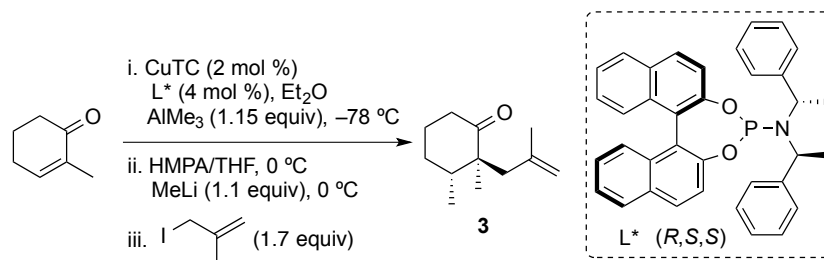

To a stirred suspension of copper(I)-thiophene-2-carboxylate (69 mg, 0.36 mmol, 0.02 equiv) in 15 mL Et<sub>2</sub>O was added (*R,S,S*)-(+)-(3,5-dioxa-4-phospha-cyclohepta[2,1-*a*;3,4-*a'*]dinaphthalen-4-yl)bis(1-phenylethyl) amine (392 mg, 0.72 mmol, 0.04 equiv). After stirring for 15 min at 23 °C, the resulting suspension was cooled to –35 °C and 2-methylcyclohex-2-en-1-one (2.1 mL, 18.2 mmol, 1 equiv) was added. Subsequently, AlMe<sub>3</sub> (2M in heptane, 10.4 mL, 20.9 mmol, 1.15 equiv) was added slowly over a period of 15 min and allowed to react for 3 h at –35 °C (the mixture turns milky bright yellow upon addition of AlMe<sub>3</sub>).

After 3 h at –35 °C, dry THF (15 mL) and HMPA (12 mL) were added and the mixture allowed to warm to –5 °C. MeLi (1.6 M in Et<sub>2</sub>O, 12.7 mL, 20.3 mmol, 1.07 equiv) was added dropwise over 5 min from –5 °C to 0 °C (the reaction turns greenish upon addition of MeLi). After 20 min stirring, methallyl iodide (3.5 mL, 32.7 mmol, 1.7 equiv) was slowly added over 5 min. The reaction mixture was left at 0 °C for 30 min and slowly warmed to 23 °C and left stirring at this temperature for 60 h. The reaction was then quenched with a saturated aqueous solution of potassium sodium tartrate and extracted with dichloromethane (5 × 100 mL). The combined organic layers were washed with saturated aqueous NH<sub>4</sub>Cl (200 mL) and brine (200 mL) and finally dried over Na<sub>2</sub>SO<sub>4</sub>. The volatiles were removed under vacuum and the crude mixture was purified by column chromatography on silica gel eluting with pentane/Et<sub>2</sub>O 100:1 to 30:1 to afford a colorless liquid (3:1 mixture of diastereomers **3** and **3'**, 1.8 g, 10 mmol, 55% yield, 90% ee). The desired diastereomer **3** could be separated after several chromatography columns eluting with pentane/Et<sub>2</sub>O 80:1 in essentially pure form (> 30:1 *dr*).

The *dr* was determined by integrating the olefinic protons in the <sup>1</sup>H-NMR of both diastereomers. The *ee* was determined by HPLC.

**Major diastereomer:** <sup>1</sup>H NMR (400 MHz, CDCl<sub>3</sub>) δ 4.81 – 4.77 (m, 1H), 4.67 – 4.63 (m, 1H), 2.65 (d, *J* = 13.9 Hz, 1H), 2.50 (dddd, *J* = 15.1, 7.0, 5.8, 1.5 Hz, 1H), 2.41 – 2.28 (m, 2H), 2.00 – 1.84 (m, 3H), 1.80 – 1.68 (m, 1H), 1.60 (s, 3H), 1.57–1.45 (m, 1H), 0.98 (s, 3H), 0.91 (d, *J* = 6.8 Hz, 3H). <sup>13</sup>C NMR (100 MHz, CDCl<sub>3</sub>) δ 215.7, 142.9, 114.5, 52.0, 44.3, 38.4, 38.3, 28.8, 24.2, 23.5, 19.7, 15.8. [*α*]<sub>D</sub> (CHCl<sub>3</sub>, *c* 1.02, 26 °C) = –10.0 °. MS (GSMS) *m/z* 180.1.

**HPLC** Chiralpack IC (4.6 mm × 250 mm); hexane:IPA 99:1; 0.85 mL/min; λ = 210 nm, 5 μL injection; *t*<sub>R</sub> (major) 7.5–7.6 min, *t*<sub>R</sub> (minor) 7.8–8.0 min, 91–92% *ee*.

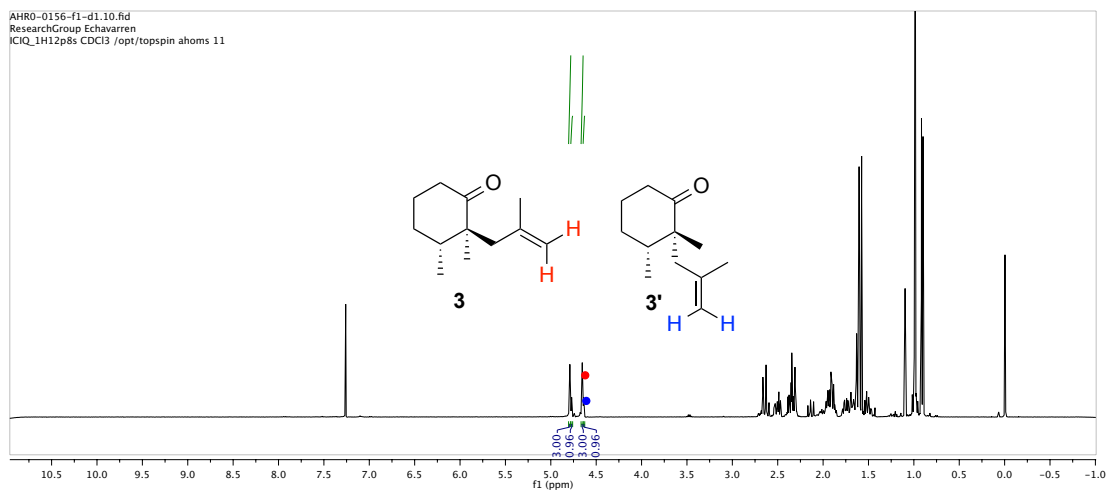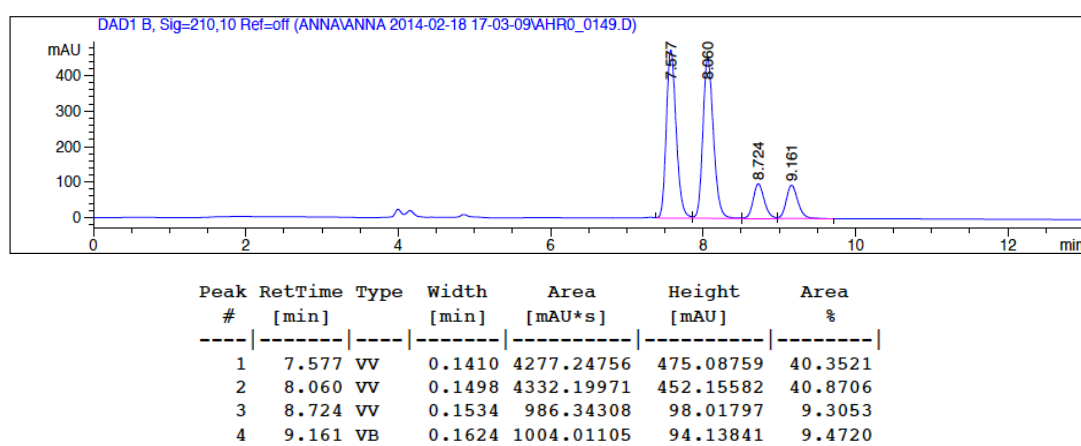

Figure S2 HPLC chromatogram of racemic **3**+**3'**

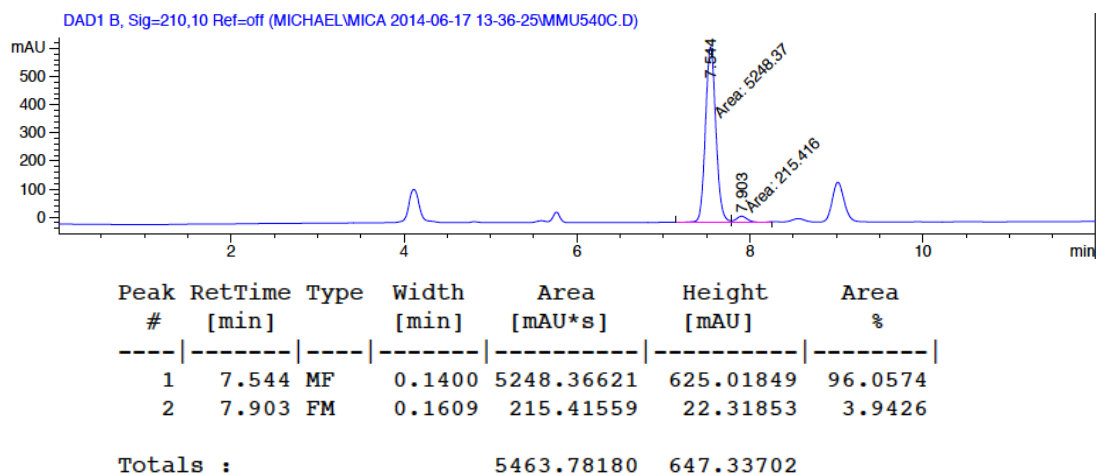

Figure S3 Enantioenriched mixture of **3**+**3'**: *ca.* 92% *ee*



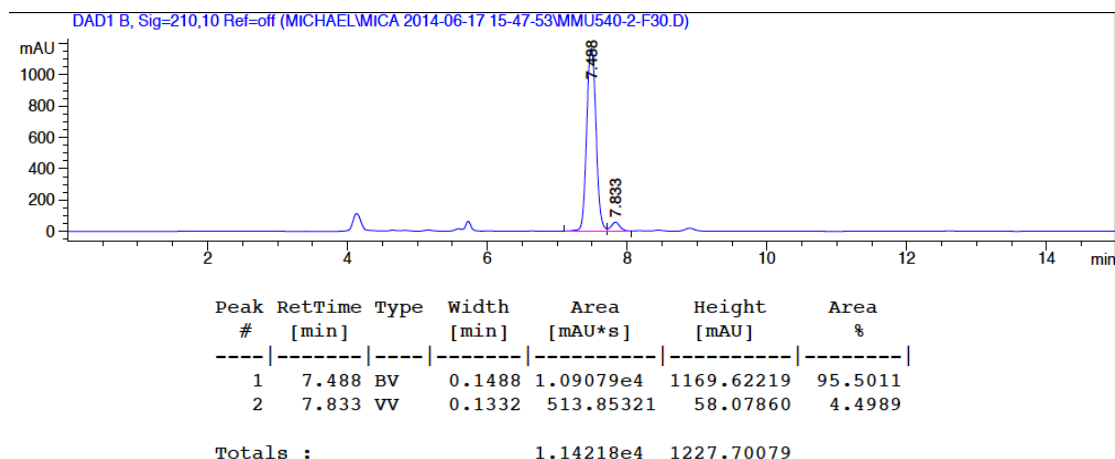

Figure S4 Enantioenriched pure **3**: *ca.* 91% *ee*

**(2*R*,3*R*)-2,3-dimethyl-2-(2-methylprop-1-en-1-yl)cyclohexan-1-one (4)**

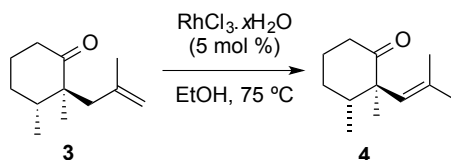

**3** (70 mg, 0.38 mmol, 1 equiv) was placed in a 20 mL microwave vial and dissolved in 20 mL of HPLC analytical grade EtOH and  $\text{RhCl}_3 \cdot x\text{H}_2\text{O}$  (64 mg, 0.117 mmol, 38% Rh, 0.3 equiv) was added. The vial was sealed and heated at 75 °C for 4 h.

Six experiments were conducted and after cooling to 23 °C, the combined mixtures were poured on 400 mL of brine and extracted with pentane ( $5 \times 400$  mL). After drying over  $\text{Na}_2\text{SO}_4$ , the solvent was concentrated and the crude residue was purified by column chromatography eluting with pentane/ $\text{Et}_2\text{O}$  50:1 to afford **4** as a colorless liquid (314 mg, 1.74 mmol, 75% yield) as a 15:1 mixture of **4**:**3**.

The reaction was also performed decreasing the amount of catalyst to *ca.* 5% and increasing the concentration. Thus, **3** (58 mg, 0.322 mmol, 1 equiv) was placed in a 5 mL microwave vial and dissolved in HPLC analytical grade EtOH (5 mL) and  $\text{RhCl}_3 \cdot x\text{H}_2\text{O}$  (10 mg, 0.019 mmol, 38% Rh, 0.056 equiv) was added. The vial was sealed and heated at 75 °C for 4.5 h. The work-up and purification were the same as previously stated.

**4** was isolated as a colorless oil (43 mg, 0.238 mmol, 74% > 97:3 mixture of **4**:**3**).

**<sup>1</sup>H NMR** (400 MHz,  $\text{CDCl}_3$ )  $\delta$  5.37 (p,  $J = 1.4$  Hz, 1H), 2.73 – 2.60 (m, 1H), 2.21 – 2.11 (m, 2H), 2.11 – 2.03 (m, 1H), 1.91 – 1.78 (m, 2H), 1.71 (d,  $J = 1.4$  Hz, 3H), 1.45 – 1.38 (m, 1H), 1.42 (d,  $J = 1.3$  Hz, 3H), 1.07 (s, 3H), 0.83 (d,  $J = 6.9$  Hz, 3H). **<sup>13</sup>C NMR** (100 MHz,  $\text{CDCl}_3$ )  $\delta$  216.5, 133.8, 132.4, 54.6, 45.0, 39.3, 28.8, 27.1, 23.9, 20.7, 18.5, 14.4.  **$[\alpha]_D$**  ( $\text{CHCl}_3$ ,  $c$  0.50, 26 °C) = 60.5 °. **MS** (GSMS)  $m/z$  180.1

**((5*R*,6*R*)-5,6-dimethyl-6-(2-methylprop-1-en-1-yl)cyclohex-1-en-1-yl trifluoromethanesulfonate (5)**

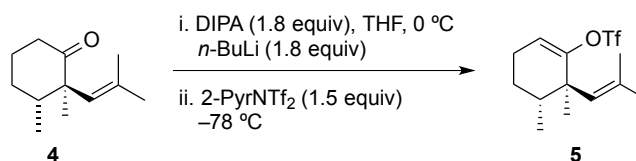

A solution of distilled diisopropylamine (0.35 mL, 2.50 mmol) in anhydrous THF (10 mL) was cooled to 0 °C and *n*-BuLi (2.5 M in hexane, 1.0 mL, 2.50 mmol) was added dropwise. After 10 min at 0 °C, the solution was cooled to -78 °C and **4** (240 mg, 1.33 mmol) was added as a solution in anhydrous THF (2 mL). After 1 h stirring at -78 °C, a solution of *N*-(2-pyridyl)bis(trifluoromethanesulfonimide) (800 mg, 2.24 mmol) in anhydrous THF (1 mL) was added. The resulting mixture was allowed to warm to 0 °C for 1 h and then stirred at room temperature for 16 hours. It was then poured on brine (100 mL) and extracted with pentane (5 × 50 mL). The combined organic layers were washed with brine (2 × 50 mL), dried over Na<sub>2</sub>SO<sub>4</sub> and the solvent removed *in vacuo*. The crude mixture was purified by column chromatography on silica gel eluting with pentane to afford **5** as a colorless oil (340 mg, 1.09 mmol, 82% yield).

**<sup>1</sup>H NMR** (400 MHz, CDCl<sub>3</sub>) δ 5.71 (dd, *J* = 5.2, 3.1 Hz, 1H), 4.94 (app. pent, *J* = 1.5 Hz, 1H), 2.32 – 2.14 (m, 2H), 2.05 (app. dqd, *J* = 11.9, 6.9, 3.1 Hz, 1H), 1.71 (d, *J* = 1.4 Hz, 3H), 1.68 (d, *J* = 1.3 Hz, 3H), 1.58 – 1.37 (m, 2H), 1.14 (s, 3H), 0.92 (d, *J* = 6.9 Hz, 3H). **<sup>13</sup>C NMR** (100 MHz, CDCl<sub>3</sub>) δ 154.7, 135.0, 127.7, 118.3 (q, *J*<sub>C-F</sub> 319.2 Hz), 115.4, 43.1, 39.2, 27.4, 26.1, 23.8, 21.0, 18.4, 16.2. **<sup>19</sup>F NMR** (376 MHz, CDCl<sub>3</sub>) δ<sub>F</sub> -75.4. **HRMS** (ESI+) calculated mass for [C<sub>13</sub>H<sub>19</sub>F<sub>3</sub>O<sub>3</sub>SN<sub>a</sub>]<sup>+</sup> (*M*+Na<sup>+</sup>) *m/z* 335.0899, measured mass *m/z* 335.0899. [ $\alpha$ ]<sub>D</sub> (CHCl<sub>3</sub>, *c* 0.67, 25 °C) = -7.17 °.

**((((5*R*,6*R*)-5,6-dimethyl-6-(2-methylprop-1-en-1-yl)cyclohex-1-en-1-yl)ethynyl)trimethylsilane (6a)**

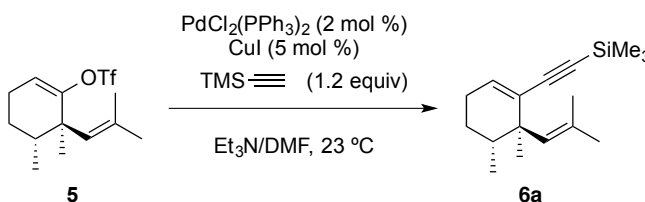

PdCl<sub>2</sub>(PPh<sub>3</sub>)<sub>2</sub> (9 mg, 0.013 mmol, 0.02 equiv) and CuI (6 mg, 0.032 mmol, 0.05 equiv) were suspended in degassed Et<sub>3</sub>N (1.43 mL, 10.2 mmol, 16 equiv). To this suspension was added **5** (200 mg, 0.64 mmol, 1 equiv) dissolved in 1 mL of degassed DMF immediately followed by addition of TMS-acetylene (0.11 mL, 0.77 mmol, 1.2 equiv). The mixture was stirred at 23 °C for 3 h, then poured on brine (50 mL) and extracted with pentane (3 × 30 mL). The combined organic layers were washed with brine (30 mL) and concentrated under reduced pressure. The crude material was used in the following reaction without further purification.

Note: alternatively this enyne can be purified by column chromatography on silica gel eluting with pentane to afford analytically pure material.

**<sup>1</sup>H NMR** (400 MHz, CDCl<sub>3</sub>) δ 6.11 (dd, *J* = 4.3, 3.4 Hz, 1H), 5.06 (app. pent, *J* = 1.2 Hz, 1H), 2.16 – 2.09 (m, 2H), 1.89 – 1.78 (m, 1H), 1.69 (d, *J* = 1.4 Hz, 3H), 1.65 (d, *J* = 1.3 Hz, 3H), 1.53 – 1.36 (m,

2H), 1.09 (s, 3H), 0.88 (d,  $J = 6.8$  Hz, 3H), 0.13 (s, 9H).  $^{13}\text{C}$  NMR (101 MHz,  $\text{CDCl}_3$ )  $\delta$  134.6, 132.6, 132.4, 131.2, 107.1, 91.0, 42.3, 37.6, 27.5, 26.6, 26.1, 22.9, 18.5, 17.2, 0.2. HRMS (APCI+) calculated mass for  $[\text{C}_{17}\text{H}_{29}\text{Si}]^+ (\text{M}+\text{H}^+)$   $m/z$  261.2033, measured mass  $m/z$  261.2033.  $[\alpha]_{\text{D}}$  ( $\text{CHCl}_3$ ,  $c$  0.75, 25 °C) =  $-17.5^\circ$ .

**(5*R*,6*R*)-1-ethynyl-5,6-dimethyl-6-(2-methylprop-1-en-1-yl)cyclohex-1-ene (6)**

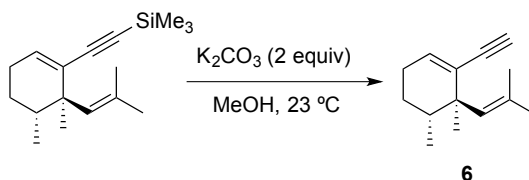

The crude material obtained previously was dissolved in MeOH (2 mL) and  $\text{K}_2\text{CO}_3$  (177 mg, 1.28 mmol, theor. 2 equiv) was added. The resulting suspension was stirred at 23 °C for 5 h (monitored by GC-MS) and poured on half-saturated brine (100 mL) and extracted with pentane ( $5 \times 50$  mL). The combined organic layers were dried over  $\text{Na}_2\text{SO}_4$  and the solvent was concentrated. Purification by column chromatography on silica gel eluting with pentane afforded **6** as a pale yellow oil (90 mg, 0.48 mmol, 74% over 2 steps).

$^1\text{H}$  NMR (400 MHz,  $\text{CDCl}_3$ )  $\delta$  6.17 (dd,  $J = 4.8, 3.4$  Hz, 1H), 5.12 (app. pent,  $J = 1.4$  Hz, 1H), 2.67 (app. s, 1H), 2.17 – 2.10 (m, 2H), 1.86 (dq,  $J = 11.9, 6.8, 3.1$  Hz, 1H), 1.72 (d,  $J$  1.5 Hz, 3H), 1.66 (d,  $J$  1.4 Hz, 3H), 1.54 – 1.47 (m, 1H), 1.45 – 1.36 (m, 1H), 1.11 (s, 3H), 0.89 (d,  $J$  6.8 Hz, 3H).  $^{13}\text{C}$  NMR (100 MHz,  $\text{CDCl}_3$ )  $\delta$  135.5, 133.0, 132.0, 130.0, 84.9, 74.2, 41.9, 37.5, 27.4, 26.5, 26.0, 22.8, 18.2, 17.0. HRMS (APCI+) calculated mass for  $[\text{C}_{14}\text{H}_{21}]^+ (\text{M}+\text{H}^+)$   $m/z$  189.1638, measured mass  $m/z$  189.1645.  $[\alpha]_{\text{D}}$  ( $\text{CHCl}_3$ ,  $c$  0.60, 26 °C) =  $19.0^\circ$ .

**(1*aS*,1*bR*,2*R*,6*aR*)-1,1,1*b*,2-tetramethyl-1*a*,1*b*,2,3,4,6*a*-hexahydrocyclopropa[*a*]inden-6(1*H*)-one (7)**

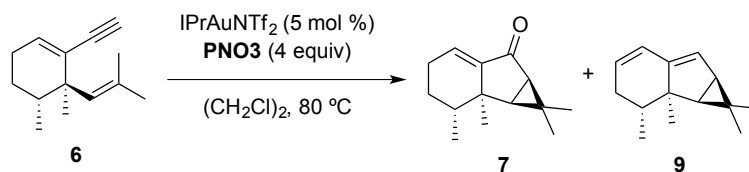

To a solution of **6** (65 mg, 0.345 mmol, 1 equiv) in  $(\text{CH}_2\text{Cl})_2$  (1.5 mL) were added 3,5-dichloropyridine *N*-oxide (226 mg, 1.381 mmol, 4 equiv) and  $\text{IPrAuNTf}_2$  (15 mg, 0.017 mmol, 0.05 equiv). The resulting mixture was stirred at 80 °C for 5 h. After cooling to 23 °C, the mixture was poured on a saturated solution of  $\text{CuSO}_4$  and extracted with  $\text{CH}_2\text{Cl}_2$  ( $3 \times 100$  mL). The combined organic layers were dried over  $\text{Na}_2\text{SO}_4$  and the solvent removed under vacuum. The crude material was purified by column chromatography on silica gel eluting with pentane/ $\text{Et}_2\text{O}$  10:1 to afford **7** as a pale yellow oil (52 mg, 0.255 mmol, 74% yield).

$^1\text{H}$  NMR (500 MHz,  $\text{CDCl}_3$ )  $\delta$  6.43 (t,  $J = 3.5$  Hz, 1H), 2.30 – 2.10 (m, 2H), 1.79 – 1.70 (m, 1H), 1.73 (d,  $J = 5.7$  Hz, 1H), 1.61 (dd,  $J = 5.5, 0.7$  Hz, 1H), 1.58 – 1.51 (m, 1H), 1.50 – 1.40 (m, 1H), 1.14 (s,

3H), 1.06 (s, 3H), 1.00 (d,  $J = 6.8$  Hz, 3H), 0.96 (s, 3H).  $^{13}\text{C}$  NMR (126 MHz,  $\text{CDCl}_3$ )  $\delta$  202.2, 146.8, 131.6, 42.4, 42.2, 39.2, 33.5, 30.2, 28.9, 26.5, 25.9, 22.5, 16.9, 16.1. HRMS (APCI+) calculated mass for  $[\text{C}_{14}\text{H}_{21}\text{O}]^+ (\text{M}+\text{H}^+)$   $m/z$  205.1587, measured mass  $m/z$  205.1590.  $[\alpha]_{\text{D}}$  ( $\text{CHCl}_3$ ,  $c$  0.53, 26 °C) =  $-39.0^\circ$ .

**(1a*S*,1b*R*,2*R*,6a*R*)-1,1,1b,2-tetramethyl-1,1a,1b,2,3,6a-hexahydrocyclopropa[*a*]indene (9)**

Along with 7, side product 9 (9 mg, 0.048 mmol, 15% yield contaminated with 10% of an unknown impurity) was also isolated.

$^1\text{H}$  NMR (500 MHz,  $\text{CDCl}_3$ )  $\delta$  6.14 (dd,  $J = 9.5, 2.4$  Hz, 1H), 5.60 (ddd,  $J = 9.7, 5.4, 2.1$  Hz, 1H), 5.33 (d,  $J = 1.4$  Hz, 1H), 2.07 – 1.98 (m, 1H), 1.97 – 1.84 (m, 2H), 1.67 (dd,  $J = 6.0, 2.0$  Hz, 1H), 1.03 – 1.01 (d,  $J = 6.5$  Hz, 3H), 1.00 (d,  $J = 6.1$  Hz, 1H), 0.95 (s, 3H), 0.90 (s, 3H).  $^{13}\text{C}$  NMR (126 MHz,  $\text{CDCl}_3$ )  $\delta$  147.5, 128.7, 123.4, 121.8, 49.0, 37.1, 34.9, 33.0, 32.8, 27.8, 24.7, 21.2, 17.1, 16.7. HRMS (EI+) calculated mass for  $[\text{C}_{14}\text{H}_{20}]^+ (\text{M}^+)$   $m/z$  188.1565, measured mass  $m/z$  188.1563.

**(1a*S*,1b*R*,2*R*,6a*R*)-1,1,1b,2-tetramethyl-1,1a,1b,2,3,6a-hexahydrocyclopropa[*a*]indene-4,6-dione, (–)-nardoaristolone B (1)**

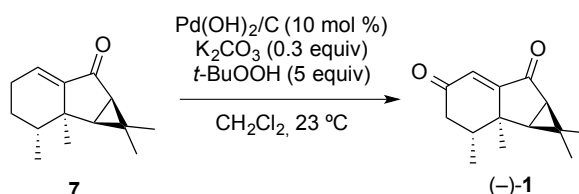

To a suspension of 7 (15 mg, 0.073 mmol, 1 equiv) in  $\text{CH}_2\text{Cl}_2$  (0.4 mL) and  $\text{K}_2\text{CO}_3$  (3 mg, 0.022 mmol, 0.3 equiv) were added  $\text{Pd}(\text{OH})_2/\text{C}$  (5 mg, 0.007 mmol, 20% Pd, 0.1 equiv) and  $t\text{-BuO}_2\text{H}$  (5M in decane, 74  $\mu\text{L}$ , 0.367 mmol, 5 equiv). The reaction was stirred for 5 h at 23 °C. The crude was filtered through Celite and the solvent was concentrated. Purification by column chromatography on silica gel eluting with pentane/Et<sub>2</sub>O 2:1 afforded the natural product (–)-nardoaristolone B (1) as a pale yellow solid (15 mg, 0.069 mmol, 93% yield).

$^1\text{H}$  NMR (500 MHz,  $\text{CDCl}_3$ )  $\delta$  6.22 (s, 1H), 2.50 – 2.37 (m, 2H), 2.29 (dd,  $J = 18.0, 13.5$  Hz, 1H), 1.99 (d,  $J = 5.5$  Hz, 1H), 1.83 (dd,  $J = 5.5, 0.8$  Hz, 1H), 1.23 (s, 3H), 1.18 (s, 3H), 1.14 (s, 3H), 1.12 (d,  $J = 6.7$  Hz, 3H).  $^{13}\text{C}$  NMR (126 MHz,  $\text{CDCl}_3$ )  $\delta$  201.3, 199.7, 164.9, 123.3, 44.1, 42.1, 42.0, 40.0, 35.3, 31.9, 28.6, 20.6, 17.6, 15.6. HRMS (ESI+) calculated mass for  $[\text{C}_{14}\text{H}_{19}\text{O}_2]^+ (\text{M}+\text{H}^+)$   $m/z$  219.1380, measured mass  $m/z$  219.1371.  $[\alpha]_{\text{D}}$  (MeOH,  $c$  0.50, 26 °C) =  $-7.40^\circ$ .<sup>5</sup> **M.p.** 96–97 °C.<sup>6</sup> Structure confirmed by X-Ray: CCDC 1037494.

**(3-((5*R*,6*R*)-5,6-dimethyl-6-(2-methylprop-1-en-1-yl)cyclohex-1-en-1-yl)prop-1-yn-1-yl)trimethylsilane**

<sup>5</sup> The reported  $\alpha_{\text{D}}$  of the isolated natural product is the following:  $[\alpha]_{\text{D}}$  (MeOH,  $c$  0.5, 26 °C) =  $-19.60^\circ$  (Liu, M.-L.; Duan, Y.-H.; Hou, Y.-L.; Li, C.; Gao, H.; Dai, Y.; Yao, X.-S. *Org. Lett.* **2013**, *15*, 1000–1003).

<sup>6</sup> Melting point of the racemate: 60–62 °C (Handore, K. L.; Reddy, D. S. *Org. Lett.* **2014**, *16*, 4252–4255).

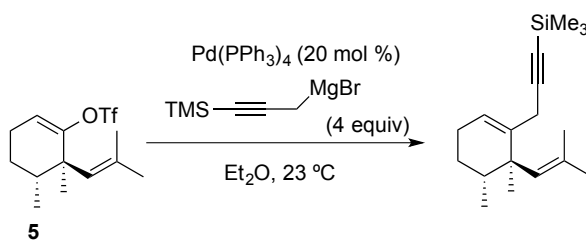

A dry 2-neck round-bottom flask equipped with a condenser, was charged with activated magnesium turnings (315 mg, 13.0 mmol, 1.5 equiv) that were covered with anhydrous diethyl ether (8 mL). Dibromoethane (10  $\mu$ L, 4.6  $\mu$ mol, catalytic) was added followed by trimethylsilylpropargyl bromide (0.5 mL, 2.9 mmol, 0.33 equiv). The reaction was initiated by warming to reflux. A gentle reflux was then maintained by slow addition of the remaining bromide (1 mL, 5.8 mmol, 0.66 equiv). After addition the mixture was heated to reflux for 20 additional minutes. The Grignard reagent was titrated and used in the following reaction.

A dry Schlenk tube was charged with  $\text{Pd(PPh}_3)_4$  (148 mg, 0.128 mmol, 0.2 equiv) which was suspended in anhydrous  $\text{Et}_2\text{O}$  (8 mL). The suspension was stirred vigorously and **5** (200 mg, 0.64 mmol, 1 equiv) was added as a solution in anhydrous  $\text{Et}_2\text{O}$  (2 mL) immediately followed by addition of the solution of Grignard reagent freshly prepared (0.37 M, 6.9 mL, 2.56 mmol, 4 equiv) were added dropwise. The resulting reaction was stirred for 20 h at 23  $^\circ\text{C}$  (monitored by GC-MS). The mixture was poured on brine (100 mL) and extracted with  $\text{Et}_2\text{O}$  ( $3 \times 50$  mL). The combined organic layers were dried over  $\text{Na}_2\text{SO}_4$ , filtered and the solvent concentrated. The crude material was used in the next step without further purification.

**(5*R*,6*R*)-5,6-dimethyl-6-(2-methylprop-1-en-1-yl)-1-(prop-2-yn-1-yl)cyclohex-1-ene (8)**

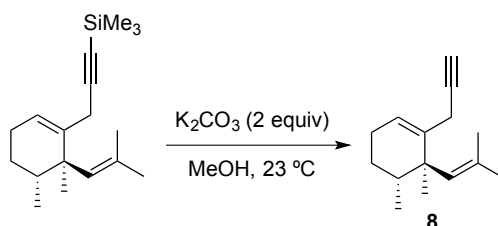

The crude material from the reaction described above (theor. 0.64 mmol, 1 equiv) was dissolved in MeOH (1.5 mL) and  $\text{K}_2\text{CO}_3$  (177 mg, 1.28 mmol, 2 equiv) was added. The resulting suspension was stirred at 23  $^\circ\text{C}$  for 6 h (monitored by GC-MS) and then poured on brine (50 mL) and extracted with pentane ( $5 \times 30$  mL). The combined organic layers were dried over  $\text{Na}_2\text{SO}_4$ , filtered and solvent was concentrated. Purification by column chromatography on silica gel eluting with pentane afforded **8** as a colourless oil (100 mg, 0.494 mmol, 77% yield over 2 steps).

**$^1\text{H}$  NMR** (400 MHz,  $\text{CD}_2\text{Cl}_2$ )  $\delta$  6.20 – 6.12 (m, 1H), 5.57 (t,  $J = 1.2$  Hz, 1H), 3.19 – 3.10 (m, 1H), 3.09 – 3.00 (m, 1H), 2.38 (t,  $J = 2.7$  Hz, 1H), 2.38 – 2.33 (m, 2H), 2.19 – 2.04 (m, 1H), 1.93 (d,  $J = 1.4$  Hz, 3H), 1.83 (d,  $J = 1.3$  Hz, 3H), 1.74 – 1.66 (m, 2H), 1.24 (s, 3H), 1.12 (d,  $J = 6.9$  Hz, 3H).  **$^{13}\text{C}$  NMR** (101 MHz,  $\text{CD}_2\text{Cl}_2$ )  $\delta$  140.1, 133.5, 132.9, 123.4, 83.8, 71.0, 43.0, 39.1, 27.5, 27.3, 26.2, 22.5, 22.4,

18.2, 17.4. **HRMS** (EI+) calculated mass for  $[C_{15}H_{22}]^+$  ( $M^+$ )  $m/z$  202.1722, measured mass  $m/z$  202.1721.  $[\alpha]_D$  ( $CHCl_3$ ,  $c$  0.37, 23 °C) =  $-2.3^\circ$ .

**(1a*S*,1b*R*,2*R*,6a*S*)-1,1,1b,2-tetramethyl-1a,1b,2,3,4,6-hexahydrocyclopropa[*a*]indene-6a(1*H*)-carbaldehyde (10)**

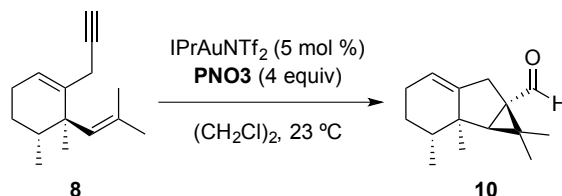

To a solution of **8** (10 mg, 0.049 mmol, 1 equiv) in  $(CH_2Cl)_2$  (0.5 mL) was added 3,5-dichloropyridine *N*-oxide (32 mg, 0.198 mmol, 4 equiv) and  $IPrAuNTf_2$  (4 mg, 4.9  $\mu$ mol, 0.1 equiv). The resulting mixture was stirred at 23 °C for 4 h. After cooling to 23 °C, the mixture was poured on a saturated solution of  $CuSO_4$  (50 mL) and extracted with  $CH_2Cl_2$  ( $3 \times 50$  mL). The combined organic layers were dried over  $Na_2SO_4$ , filtered and the solvent removed *in vacuo*. The crude material was purified by column chromatography on silica gel eluting with pentane/ $Et_2O$  20:1 to afford **10** as a pale yellow oil (7 mg, 0.032 mmol, 65% yield).

**$^1H$  NMR** (500 MHz,  $CDCl_3$ )  $\delta$  9.39 (s, 1H), 5.29 (d,  $J$  = 3.1 Hz, 1H), 3.30 – 3.23 (m, 1H), 2.28 (dd,  $J$  = 16.6, 1.5 Hz, 1H), 2.07 – 2.00 (m, 2H), 1.93 (s, 1H), 1.63 – 1.55 (m, 1H), 1.58 (d,  $J$  = 1.3 Hz, 3H), 1.52 – 1.38 (m, 2H), 1.37 (s, 3H), 1.00 (d,  $J$  = 6.8 Hz, 3H), 0.85 (s, 3H).  **$^{13}C$  NMR** (126 MHz,  $CDCl_3$ )  $\delta$  202.3, 146.4, 119.0, 51.4, 46.4, 45.6, 35.0, 34.7, 29.8, 26.9, 25.6, 24.8, 21.1, 17.3, 17.1. **HRMS** (ESI+) calculated mass for  $[C_{15}H_{22}NaO]^+$  ( $M+Na^+$ )  $m/z$  241.1563, measured mass  $m/z$  241.1555.  $[\alpha]_D$  ( $CHCl_3$ ,  $c$  0.57, 26 °C) =  $-73.9^\circ$ .

## 4. NMR Spectra

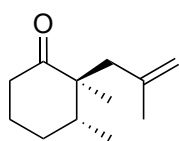

**3**

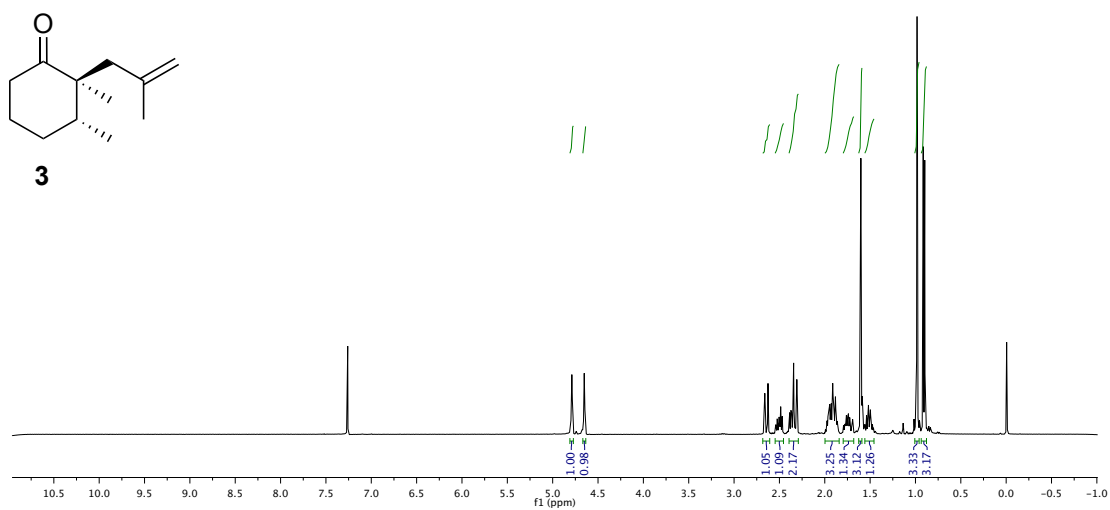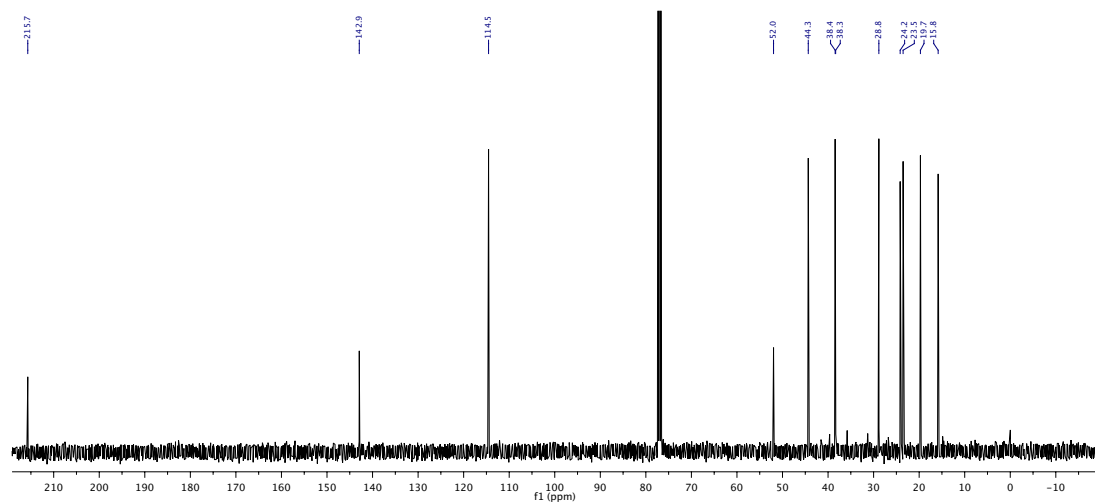

AHR0 0298-F1.10.fid  
ResearchGroup Echavarren  
ICIQ\_1H12p8s CDC13 /opt/topspin ahoms 114

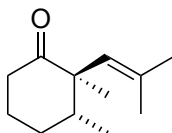

**4**

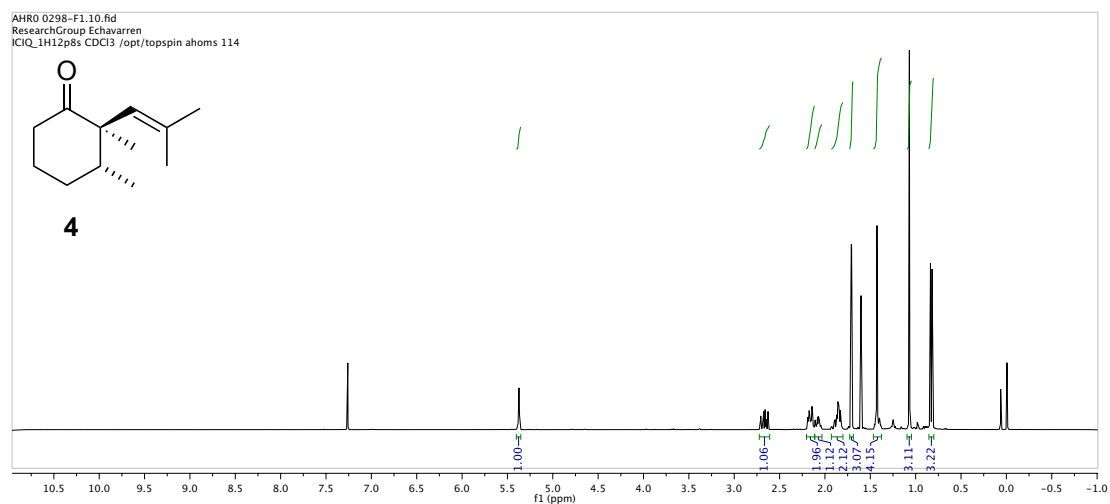

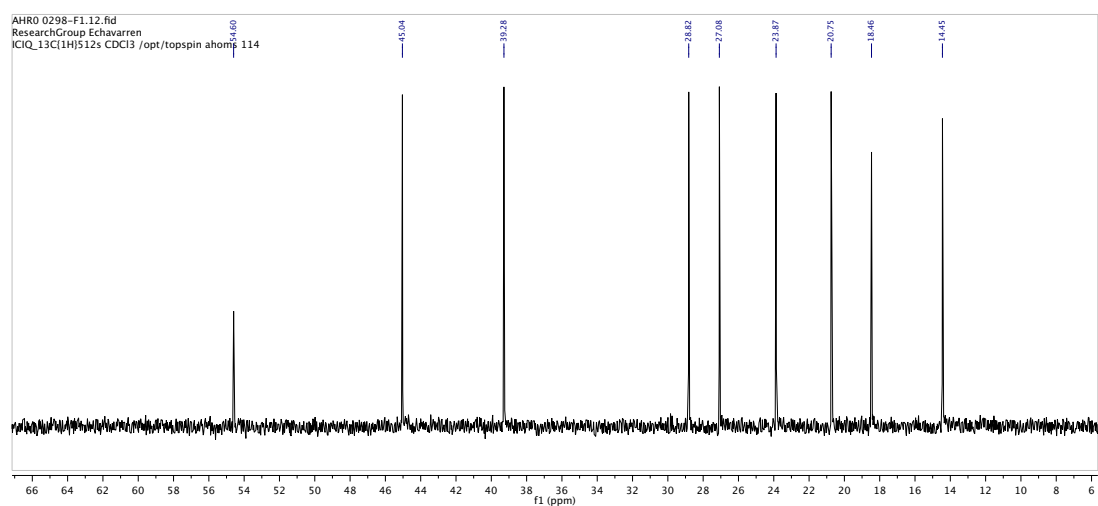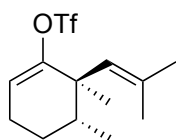

**5**

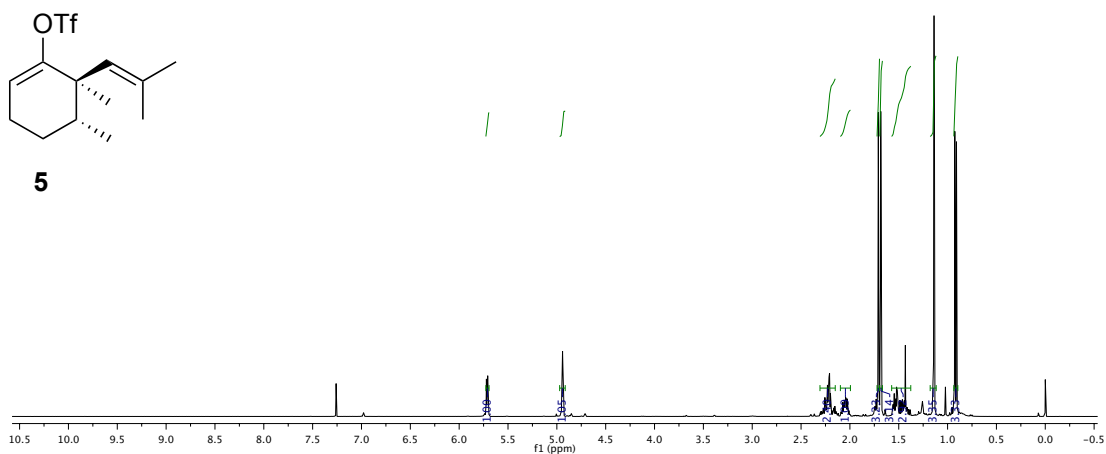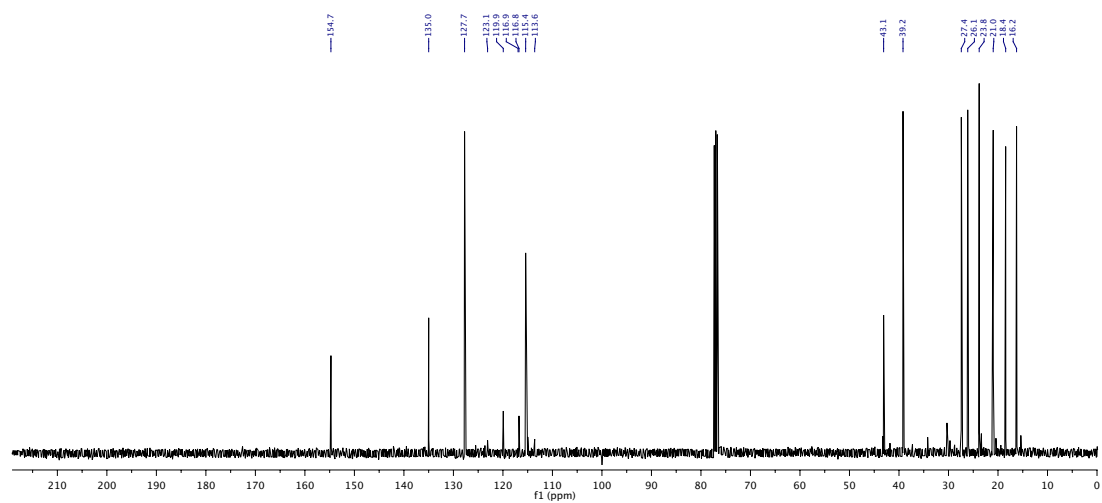



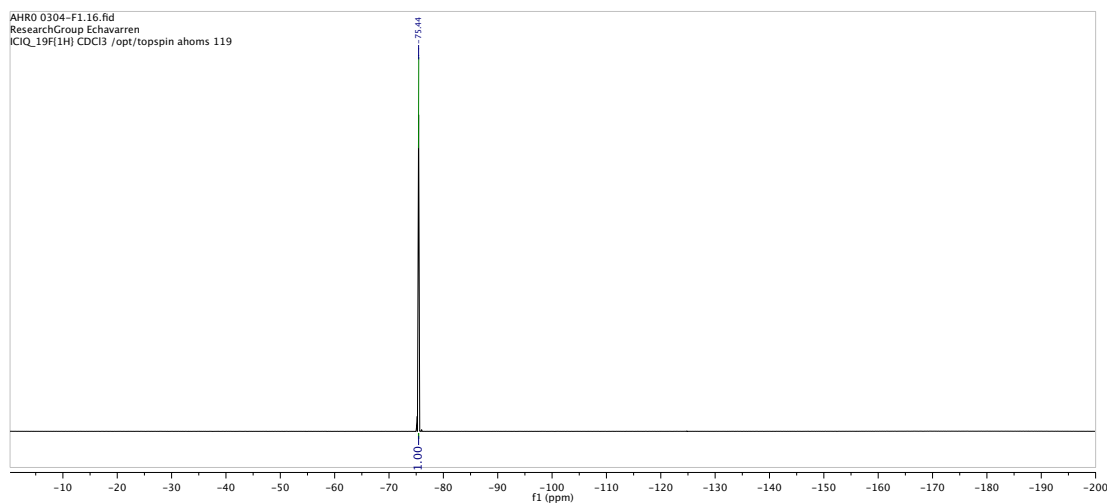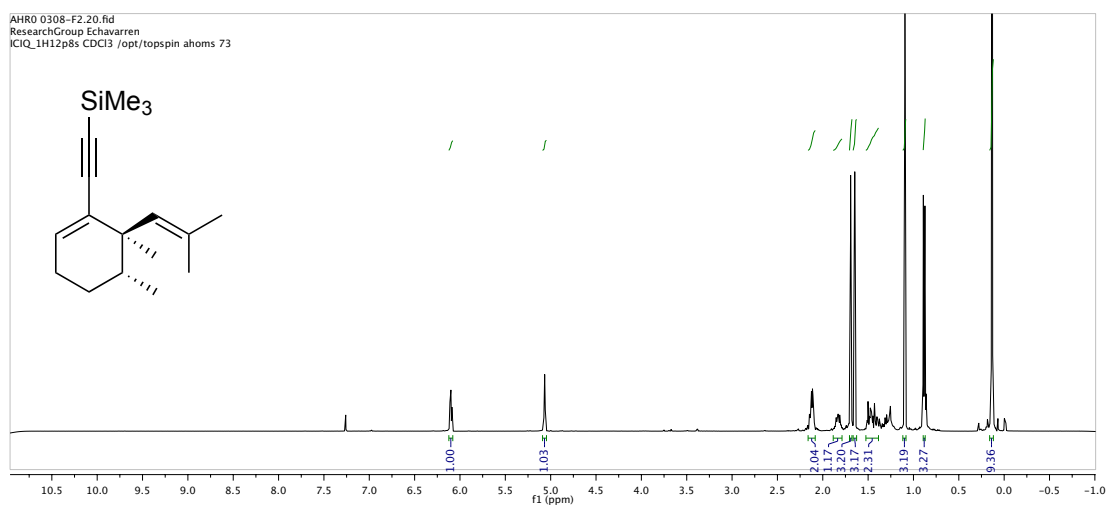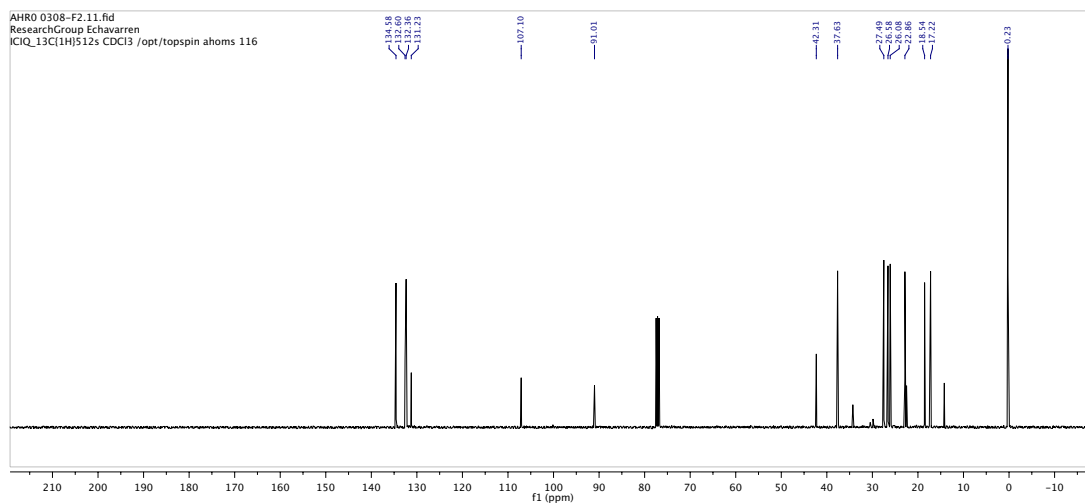

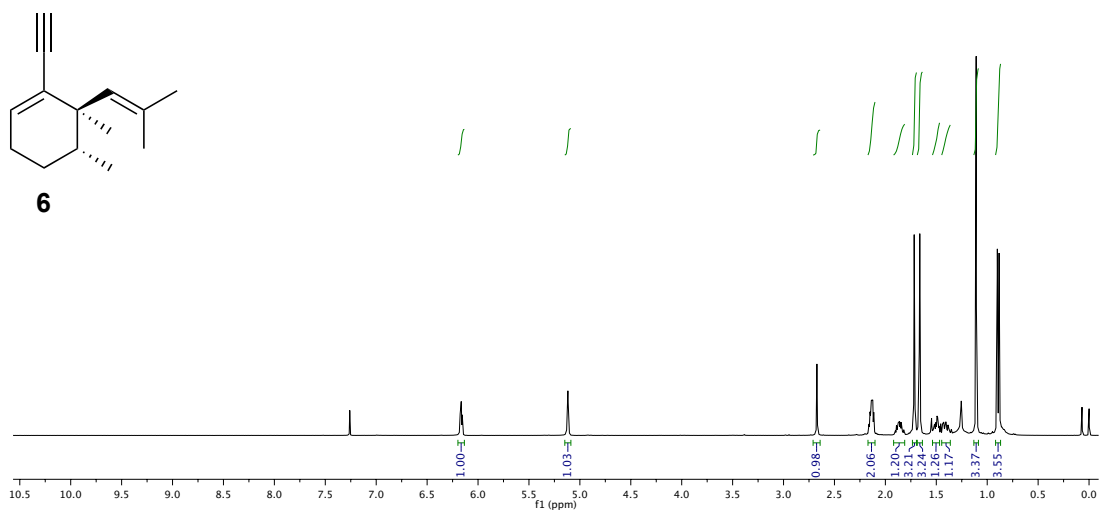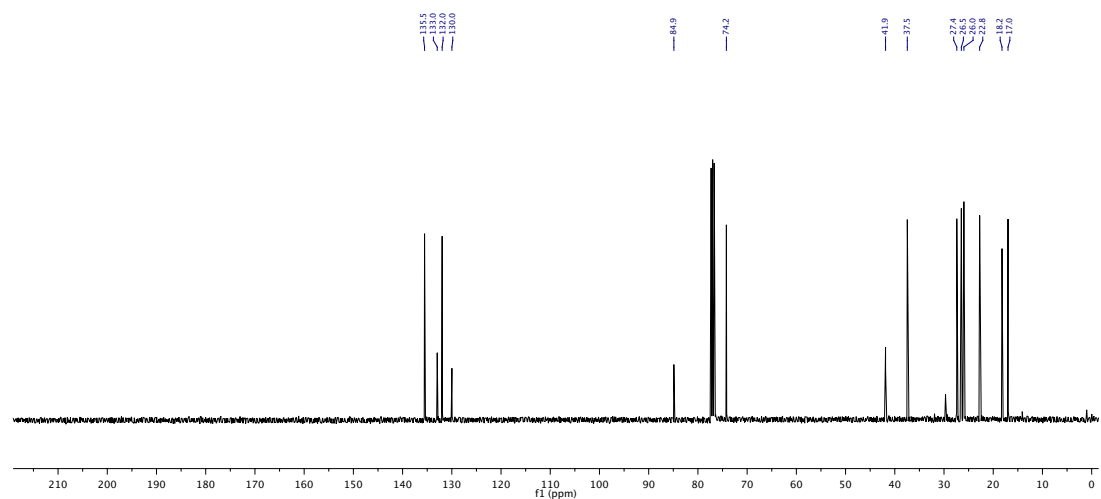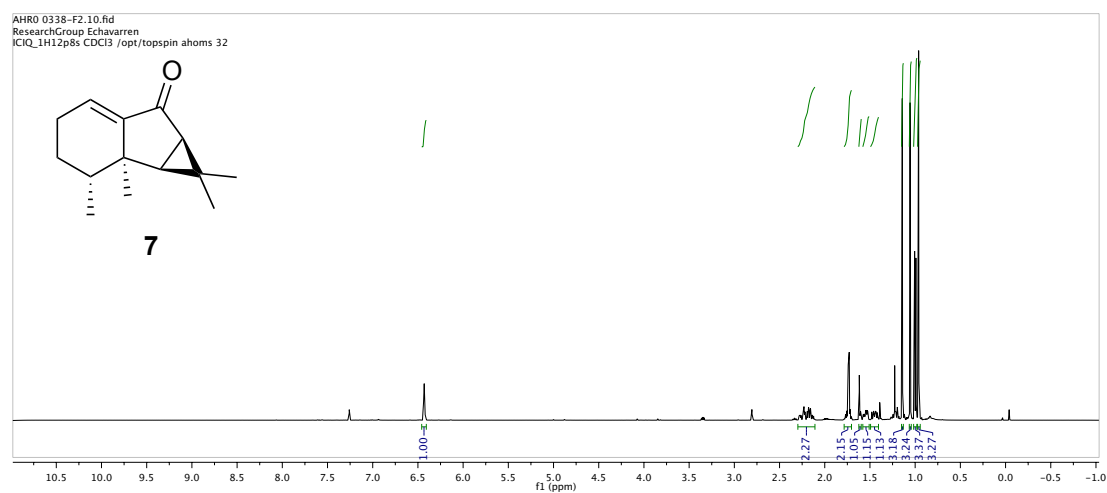

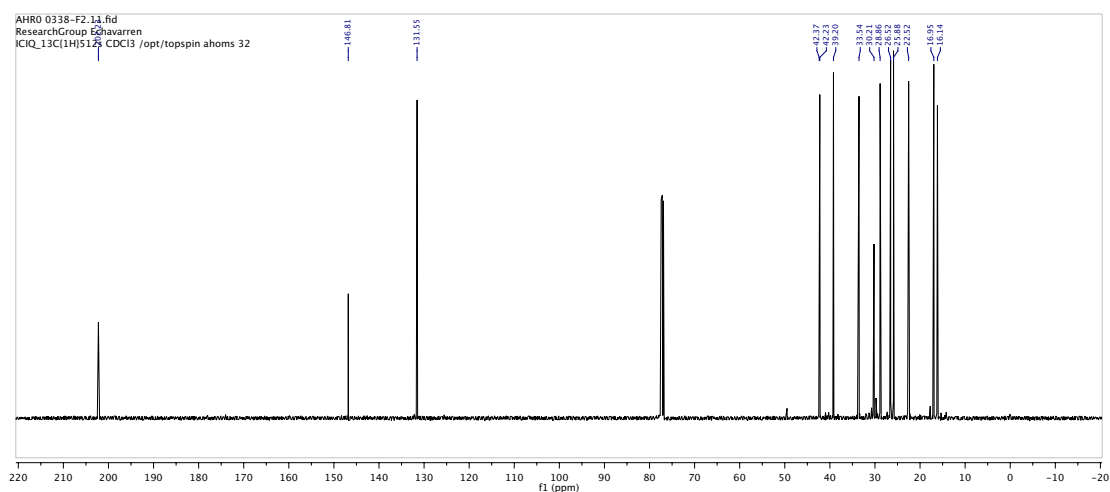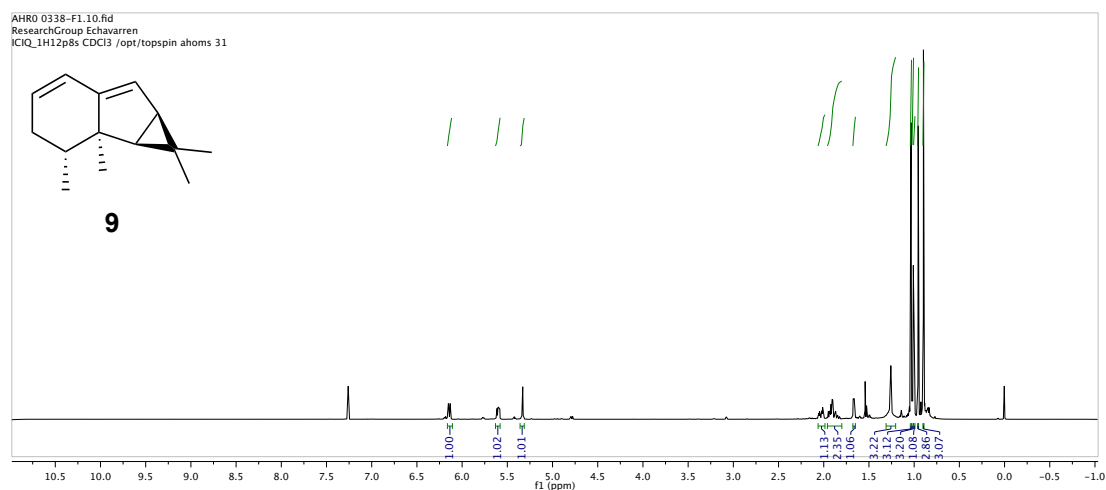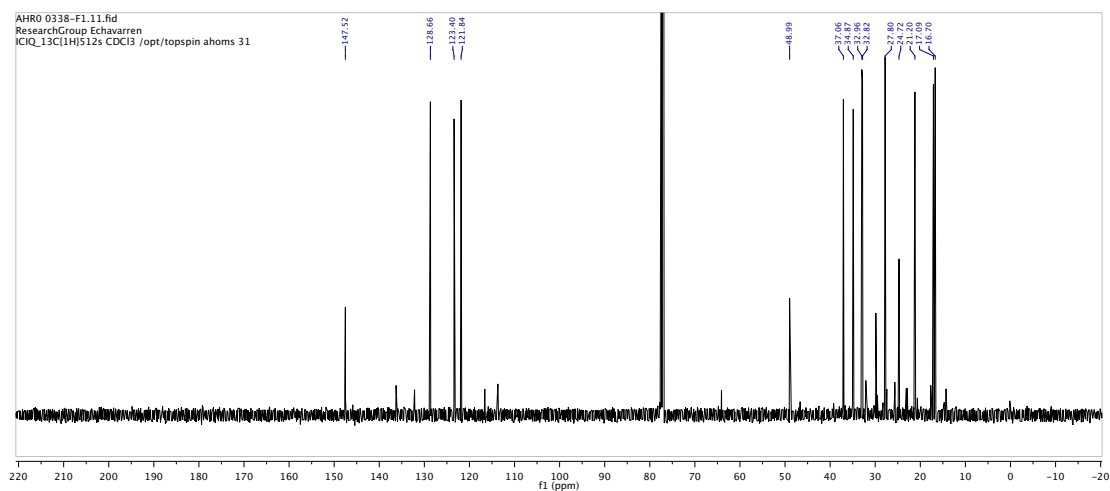

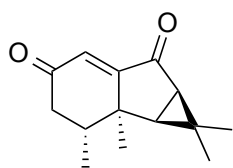

**Nardoaristolone B**

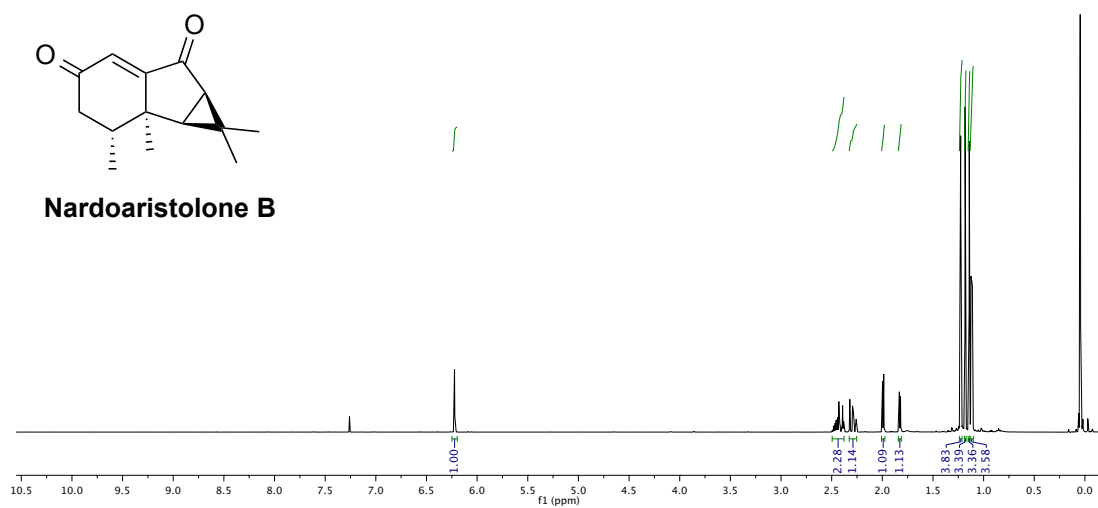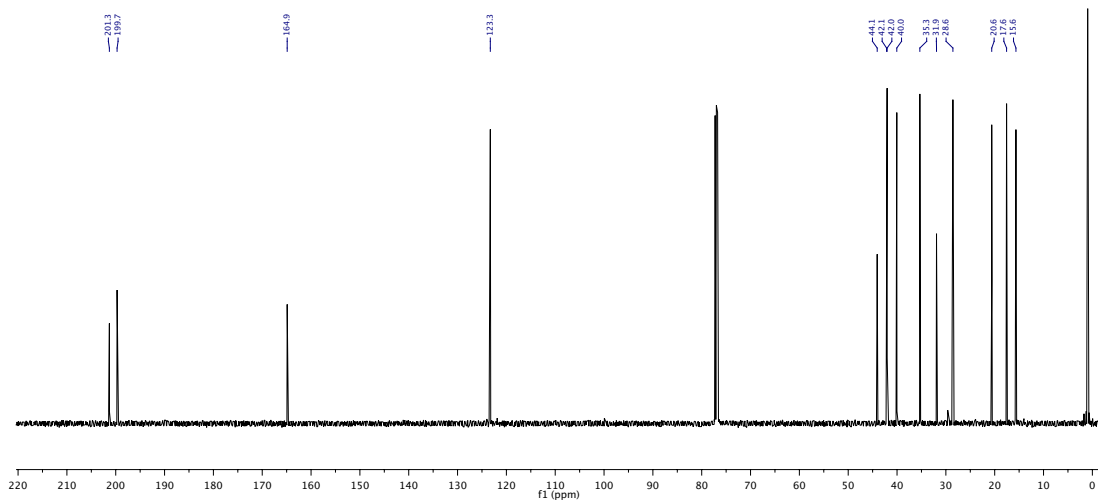

MMu0807\_16Genyne.10.fid  
ResearchGroup Echavarren  
ICIQ\_1H12p32s CD2Cl2 /opt/topspin mmuratore 92

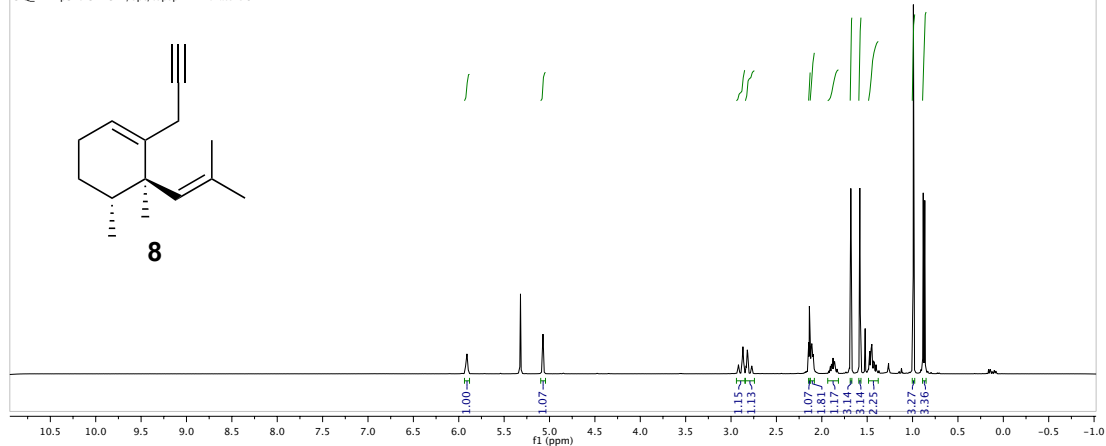

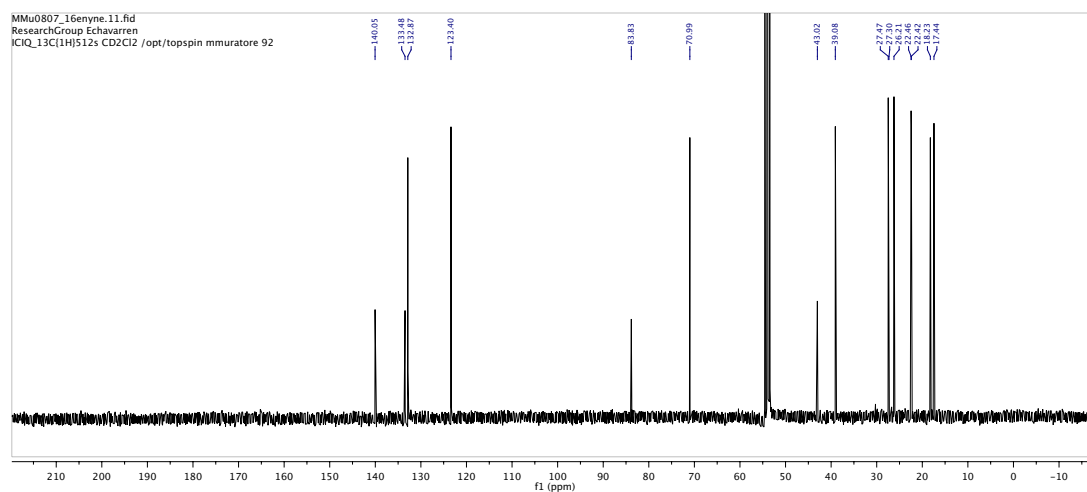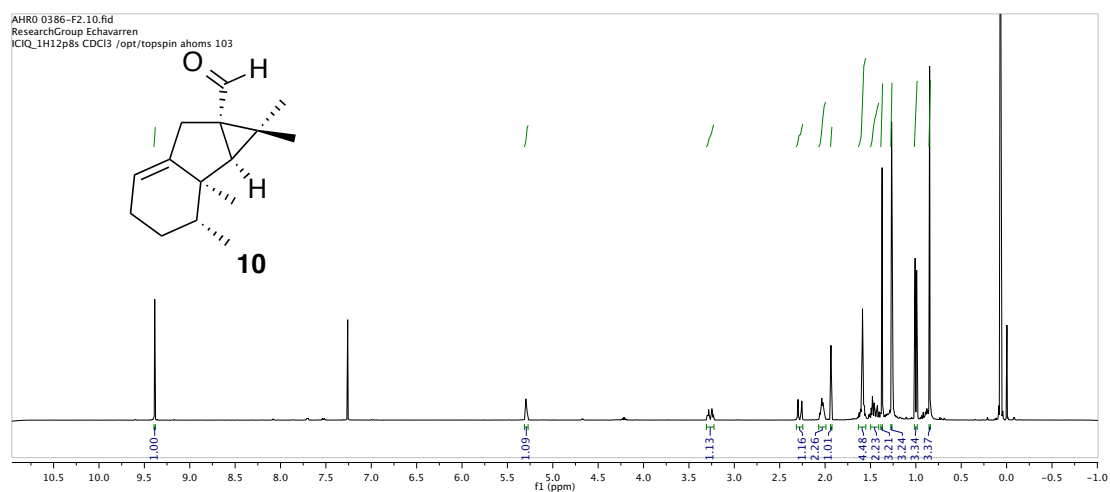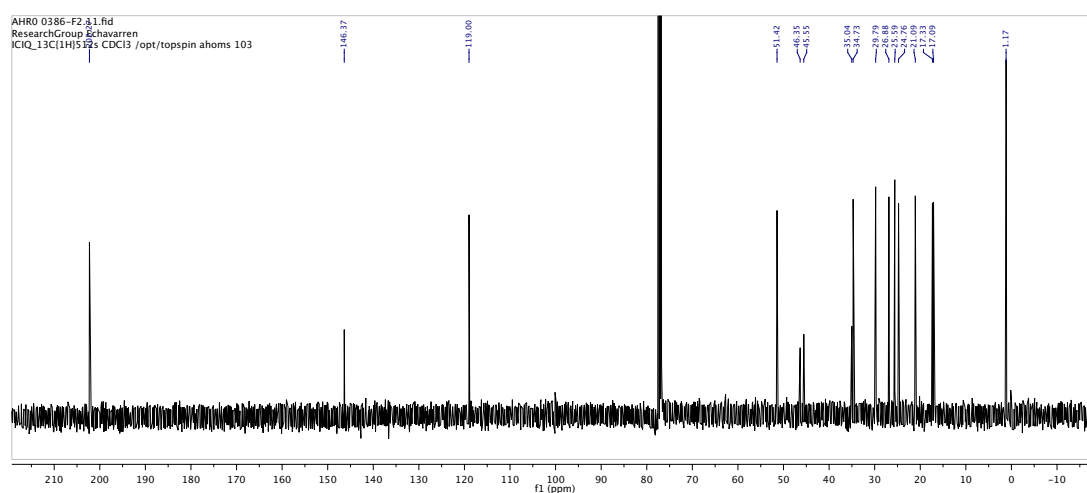

# **GOESY (irradiation at 1.93 ppm)**

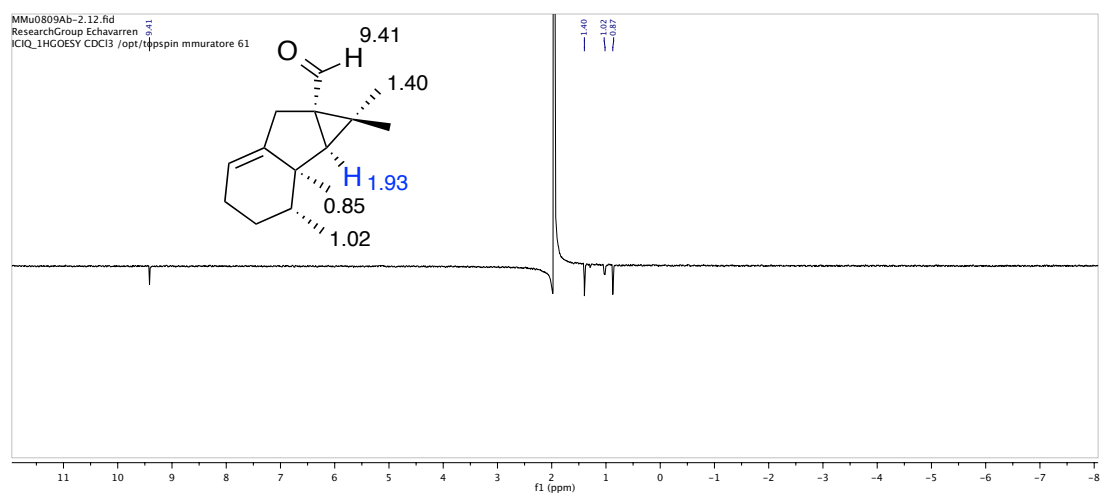

## 5. X-Ray

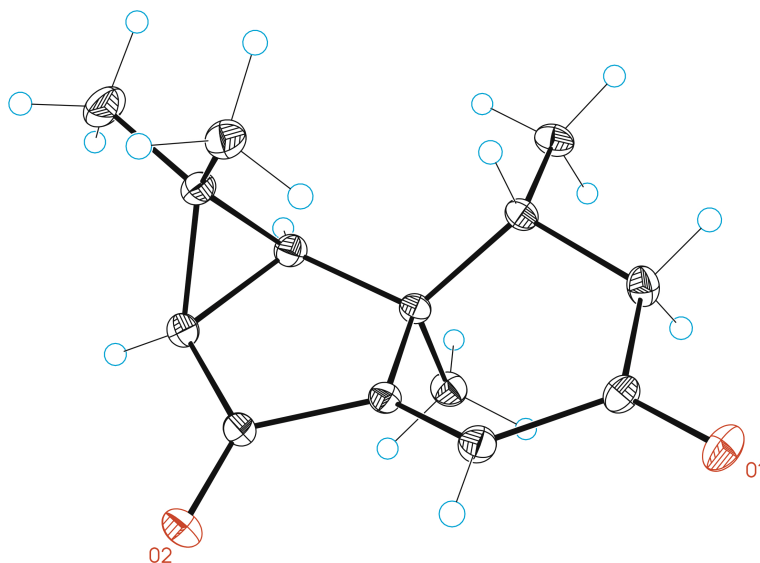

|                                 |                                                |          |
|---------------------------------|------------------------------------------------|----------|
| Identification code             | mo_MMuNardo_0m                                 |          |
| Empirical formula               | C <sub>14</sub> H <sub>18</sub> O <sub>2</sub> |          |
| Formula weight                  | 218.28                                         |          |
| Temperature                     | 100(2) K                                       |          |
| Wavelength                      | 0.71073 Å                                      |          |
| Crystal system                  | Orthorhombic                                   |          |
| Space group                     | P2(1)2(1)2(1)                                  |          |
| Unit cell dimensions            | a = 8.0591(4) Å                                | α = 90°. |
|                                 | b = 9.6081(5) Å                                | β = 90°. |
|                                 | c = 15.5767(8) Å                               | γ = 90°. |
| Volume                          | 1206.15(11) Å <sup>3</sup>                     |          |
| Z                               | 4                                              |          |
| Density (calculated)            | 1.202 Mg/m <sup>3</sup>                        |          |
| Absorption coefficient          | 0.079 mm <sup>-1</sup>                         |          |
| F(000)                          | 472                                            |          |
| Crystal size                    | 0.40 x 0.15 x 0.15 mm <sup>3</sup>             |          |
| Theta range for data collection | 2.491 to 43.527°.                              |          |
| Index ranges                    | -14 ≤ h ≤ 9, -18 ≤ k ≤ 11, -23 ≤ l ≤ 29        |          |
| Reflections collected           | 29745                                          |          |
| Independent reflections         | 7025 [R(int) = 0.0261]                         |          |
| Completeness to theta = 43.527° | 82.5%                                          |          |
| Absorption correction           | Empirical                                      |          |
| Max. and min. transmission      | 0.988 and 0.834                                |          |

|                                      |                                       |
|--------------------------------------|---------------------------------------|
| Refinement method                    | Full-matrix least-squares on $F^2$    |
| Data / restraints / parameters       | 7025/ 0/ 149                          |
| Goodness-of-fit on $F^2$             | 1.102                                 |
| Final R indices [ $I > 2\sigma(I)$ ] | $R1 = 0.0331$ , $wR2 = 0.0893$        |
| R indices (all data)                 | $R1 = 0.0355$ , $wR2 = 0.0915$        |
| Flack parameter                      | $x = -0.30(18)$                       |
| Largest diff. peak and hole          | 0.334 and -0.378 e. $\text{\AA}^{-3}$ |



### MS for compound 3

File :D:\MassHunter\GCMS\1\data\Echavarren\Michael\MMu0811F38.D  
Operator : GCMS5977A\admin  
Acquired : 27 Oct 2014 18:15 using AcqMethod Michael60-210\_50-350-11min.M  
Instrument : GCMS5977A  
Sample Name: MMu0811F38  
Misc Info :  
Vial Number: 42

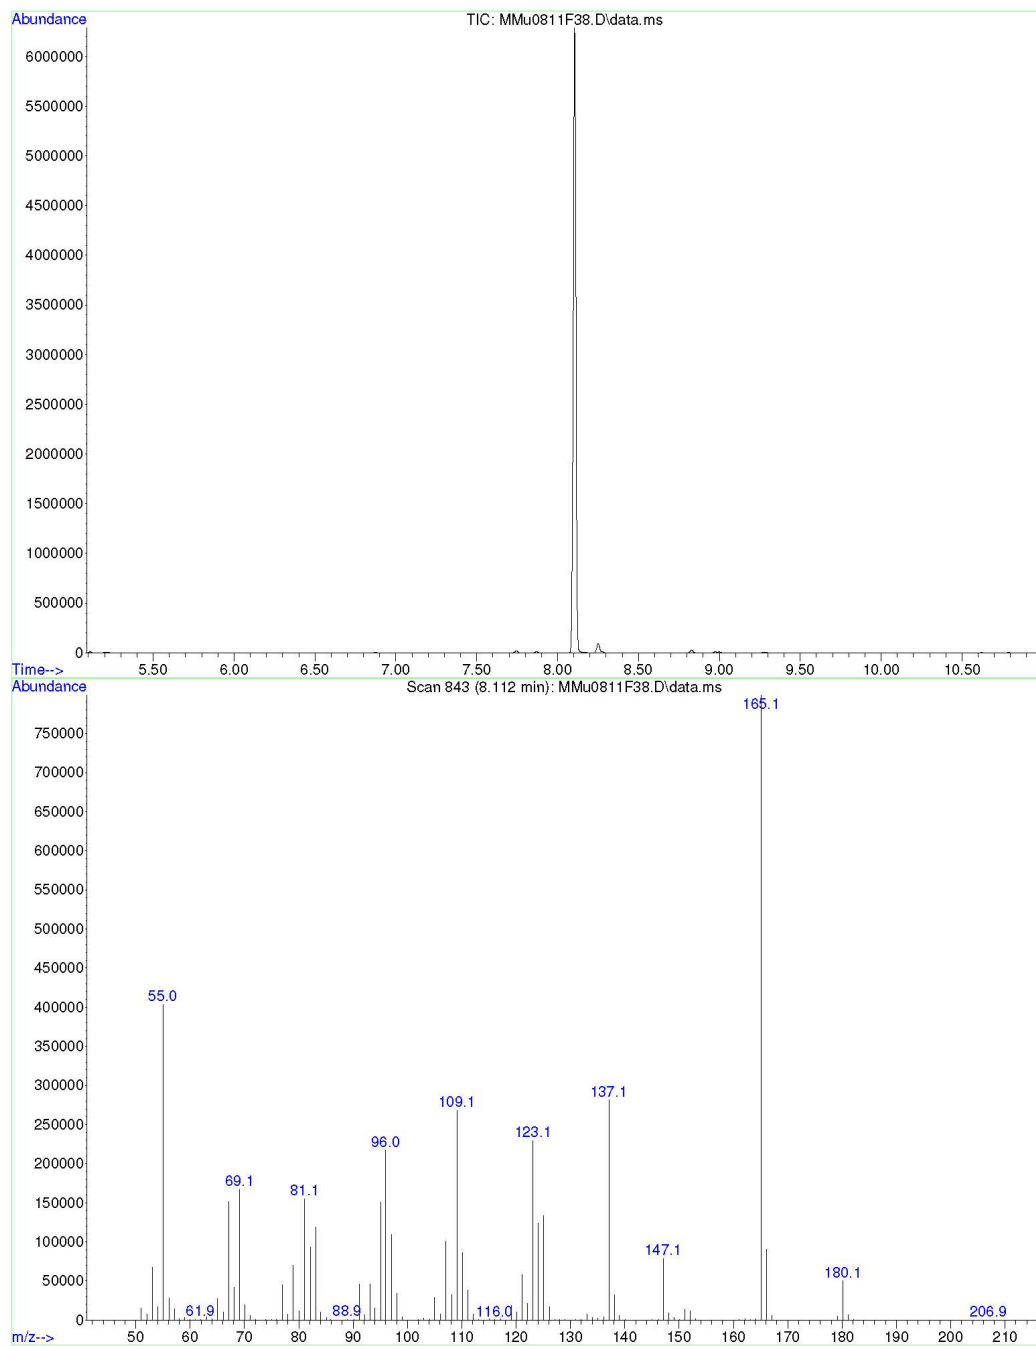

## MS for compound 4

File :D:\MassHunter\GCMS\1\data\Echavarren\Michael\MMu0814col.D  
Operator : GCMS5977A\admin  
Acquired : 07 Dec 2014 11:58 using AcqMethod Michael60-210\_50-350-11min.M  
Instrument : GCMS5977A  
Sample Name: MMu0814col  
Misc Info :  
Vial Number: 4

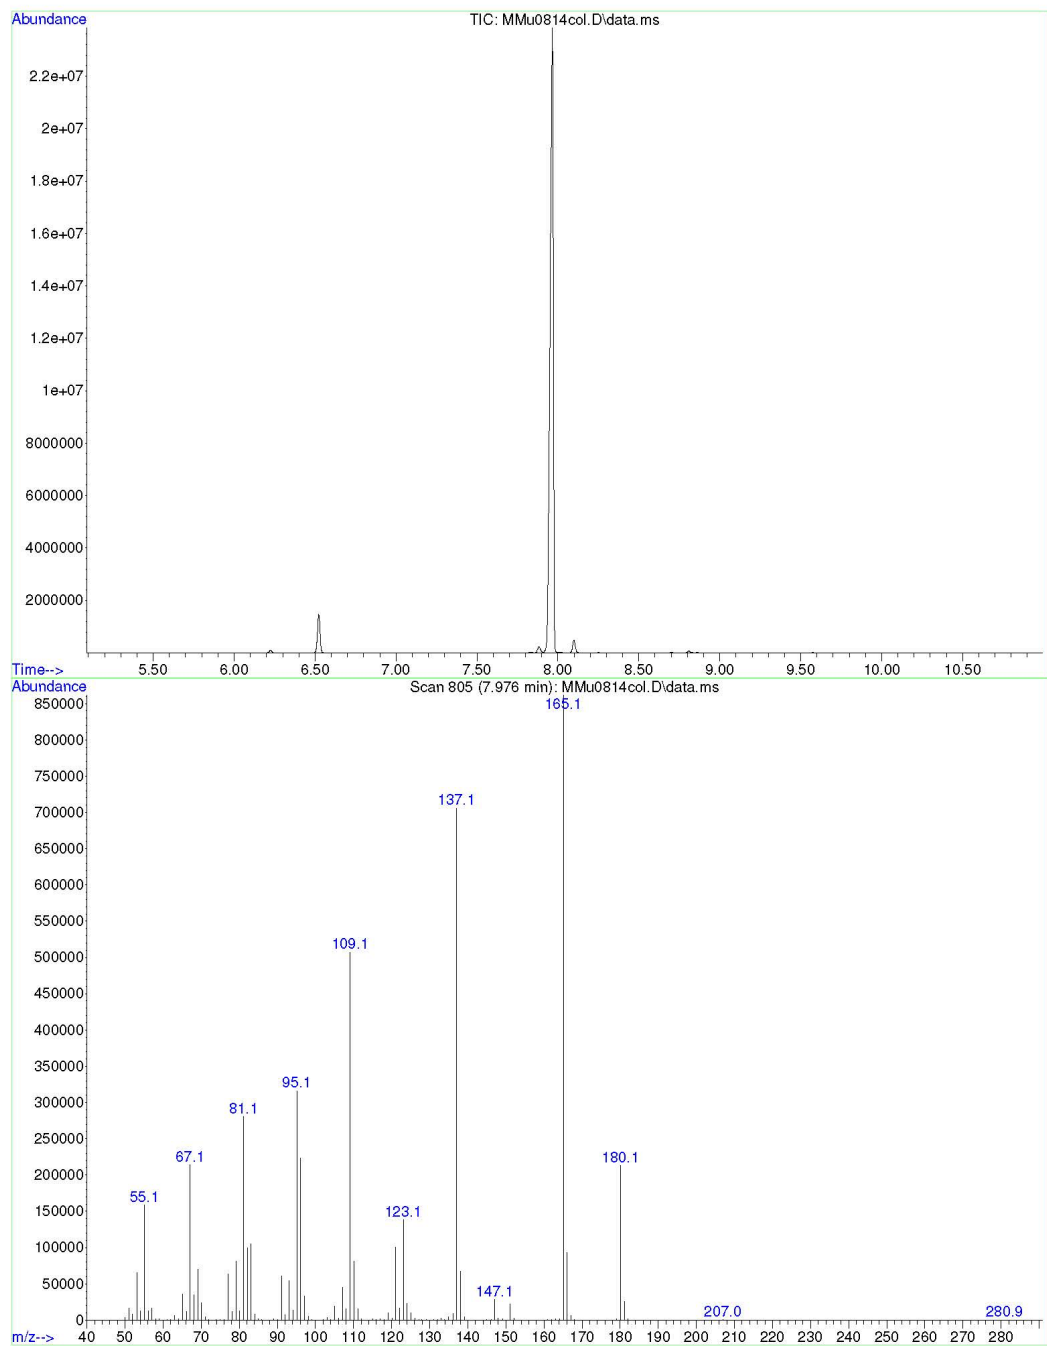

Supplement: Supplementary file 1 [file 3619290]
